# Supplementary material for: Photochemical reaction of vitamin C with silicon nanocrystals: polymerization, hydrolysis and photoluminescence
Source: Royal Society of Chemistry journal article supplement (doi:10.1039/c3tc31082e), 2013-01-01
Supplement: c3tc31082e.pdf [file c3tc31082e.pdf]

# Photochemical Reaction of Vitamin C with Silicon Nanocrystals: Polymerization, Hydrolysis and Photoluminescence

Guo-Hui Pan,<sup>a\*</sup> Alexandre Barras,<sup>a</sup> Luc Boussekey,<sup>b</sup> Xuesong Qu<sup>c</sup> and Rabah Boukherroub<sup>a\*</sup>

<sup>a</sup> *Institut de Recherche Interdisciplinaire, USR CNRS 3078, Université Lille 1, Parc de  
la Haute Borne, 50 avenue de Halley, 59658 Villeneuve d'Ascq, France*

<sup>b</sup> *Laboratoire de Spectrochimie Infrarouge et Raman, CNRSUMR 8516, Université  
Lille 1, 59655 Villeneuve d'Ascq, France*

<sup>c</sup> *Department of Physics, Changchun Normal University, Changchun, 130032, China*

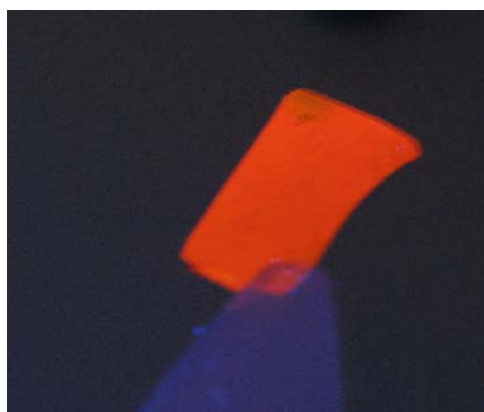

**Figure S1.** Photograph of stain etching-derived porous silicon under 365 nm excitation from a hand-held lamp.

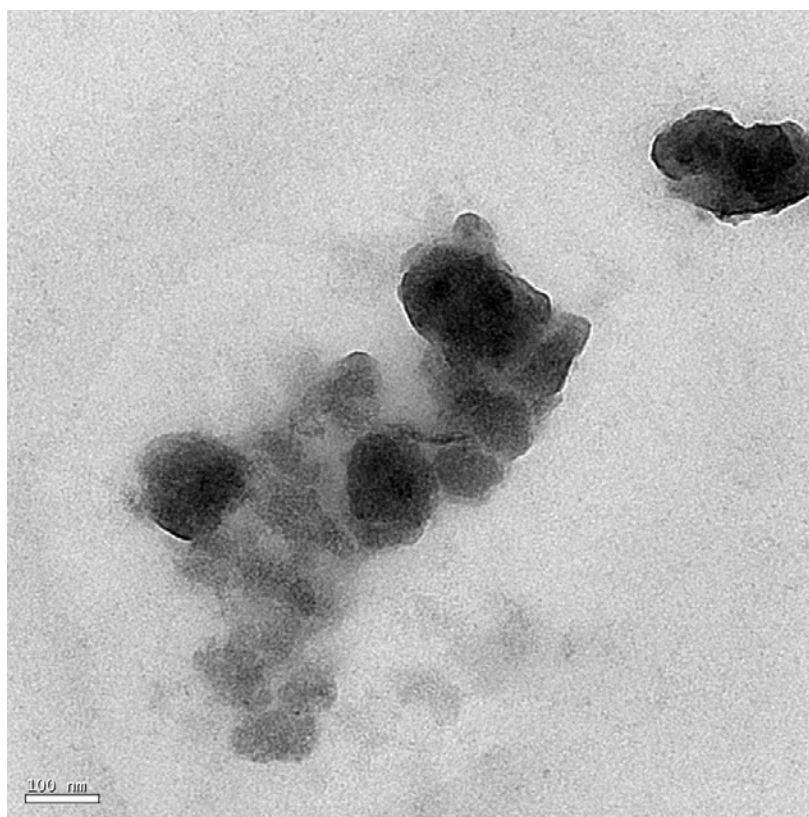

**Figure S2.** TEM image of large-sized H-SiNCs cast from toluene dispersion.

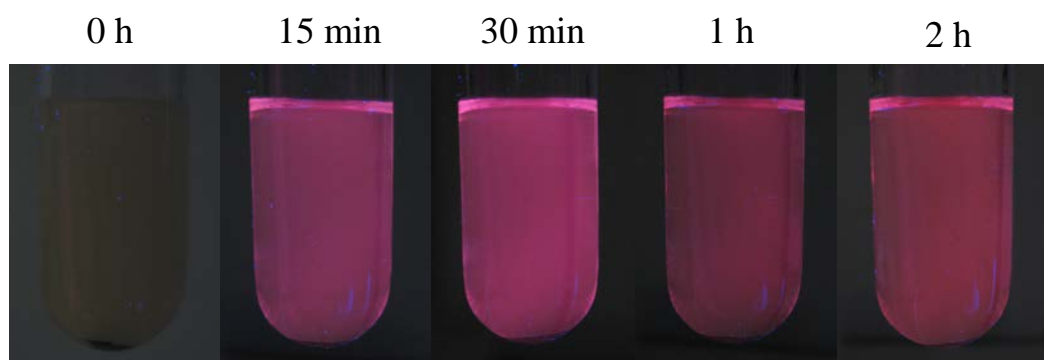

**Figure S3.** Photographs showing the photoluminescence of an ethanolic solution of fractured porous silicon after 3 h ultrasonication in neat ethanol and subsequent 254 nm irradiation for different time intervals. The photographs were taken under 365 nm excitation from a hand-held lamp.

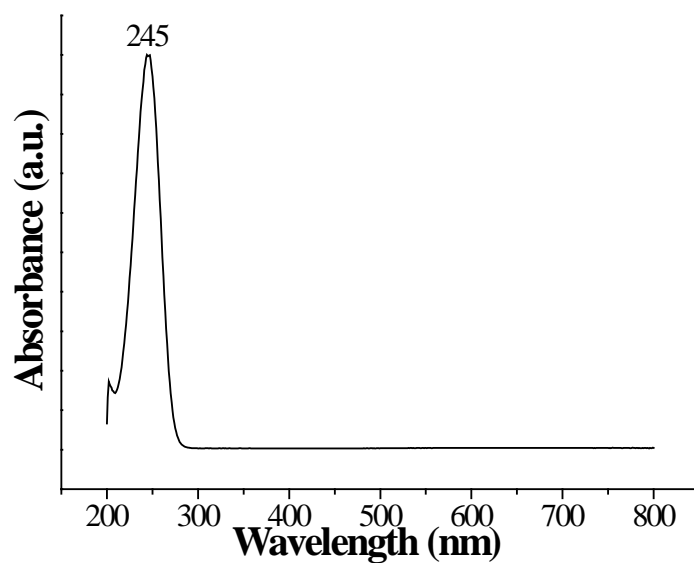

**Figure S4.** Absorption spectrum of vitamin C in ethanol. The sharp peak at 245 nm arises from  $\pi \rightarrow \pi^*$  transition of carbon-carbon double bond present in the five-membered lactone ring structure of vitamin C.

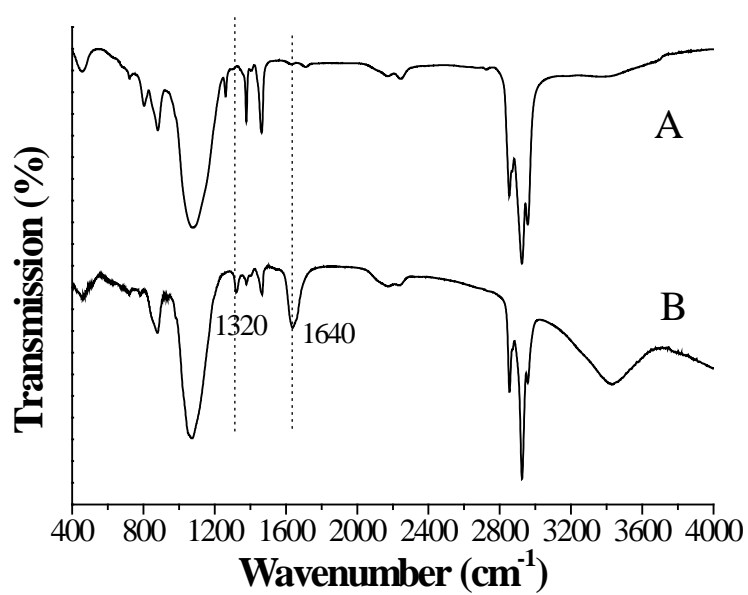

**Figure S5.** FTIR spectra of 1-decene-modified SiNCs before and after irradiation at 254 nm in the presence of VC. The additional absorption bands at 1640 and 1320 cm<sup>-1</sup> indicate polymer formation from VC.

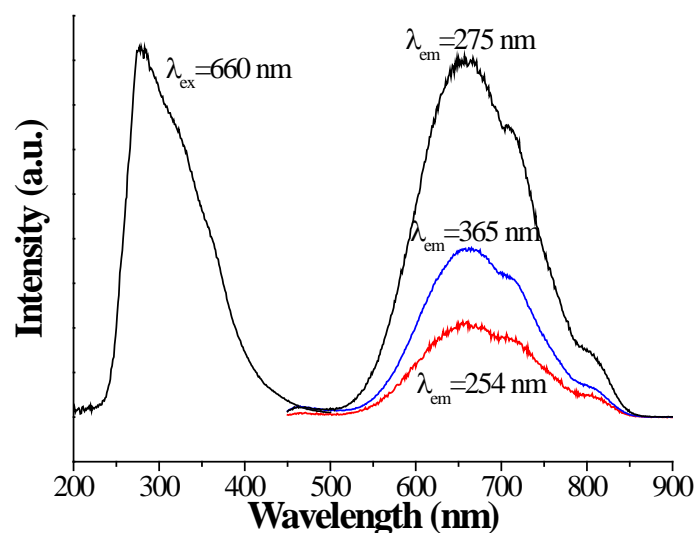

**Figure S6.** Excitation and emission spectra of supernatant collected by centrifugation of fractured porous silicon and VC ethanol solution under 254 nm irradiation for 2 h. The excitation and emission wavelengths were indicated in the spectra. The emission spectra were recorded with excitation of 254, 365 and 275 nm; the excitation spectra were recorded at emission of 660 nm.

Fluorescence and excitation spectra were recorded on a Hitachi F-4600 spectrophotometer equipped with a 150 W Xe-arc lamp and a 450 nm cutoff filter at room temperature. For comparison, the emission spectra of the sample were measured at a fixed band pass of 0.2 nm with the same instrument parameters (2.5 nm for excitation split, 2.5 nm for emission split and 700 V for PMT voltage).
